# Supplementary material for: Effects of Resistant Starch Infusion, Solely and Mixed with Xylan or Cellulose, on Gut Microbiota Composition in Ileum-Cannulated Pigs
Source: MDPI journal article supplement (doi:10.3390/microorganisms12020356), 2024-02-09
Supplement: s1 [file s1]

## Supplementary data

**Supplementary Table S1.** Ingredient composition of fiber-free diet

| Items (%)                | Content |
|--------------------------|---------|
| Corn starch              | 61.0    |
| Soybean isolated protein | 19.5    |
| Soybean oil              | 3.3     |
| Sucrose                  | 11.2    |
| Lysine                   | 0.4     |
| Met                      | 0.1     |
| Thr                      | 0.2     |
| Limestone                | 0.5     |
| Dicalcium Phosphate      | 2.5     |
| Cr2O3                    | 0.3     |
| Salt                     | 0.5     |
| Premix <sup>1</sup>      | 0.5     |
| Total                    | 100.0   |

<sup>1</sup>Premix provided the following per kg of complete diet for growing pigs: vitamin A, 5,512 IU; vitamin D3, 2,200 IU; vitamin E, 64 IU; vitamin K3, 2.2 mg; vitamin B12, 27.6 ug; riboflavin, 5.5 mg; pantothenic acid, 13.8 mg; niacin, 30.3 mg; choline chloride, 551 mg; Mn, 40 mg; Fe, 100 mg; Zn, 100 mg; Cu, 100 mg; I, 0.3 mg; Se, 0.3 mg; Met, DL-Methionine; Thr, L-Threonine.
